# Supplementary material
Source: Springer Nature journal article supplement (https://www.springermedizin.de/resource/supplementary/12936_2010_1647_MOESM1_ESM.pdf/9542252)

Year 1992

Official Member

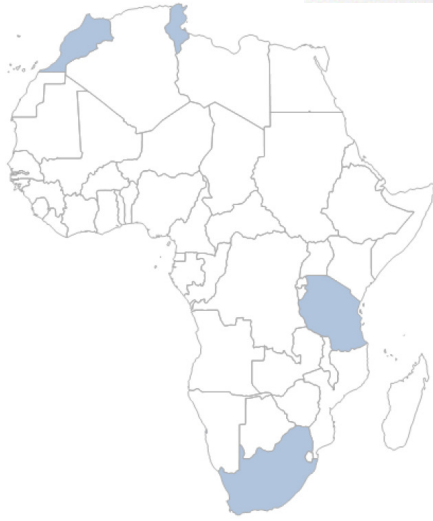

Year 2000

Official Member

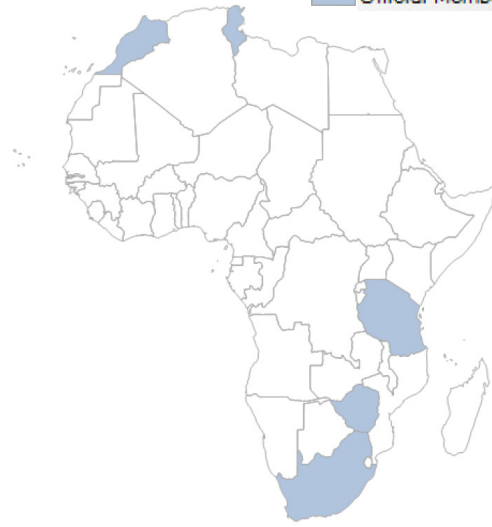

Year 2005

Official Member

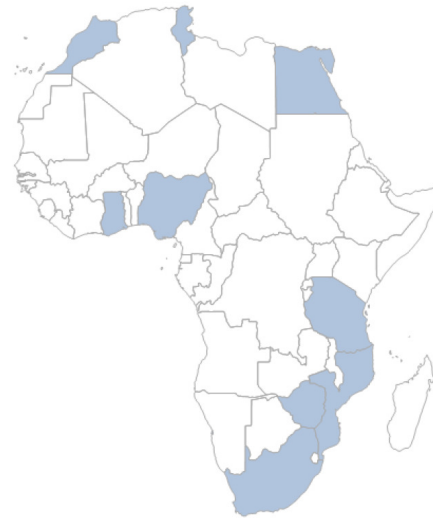

Year 2010

Official Member  
Associate Member

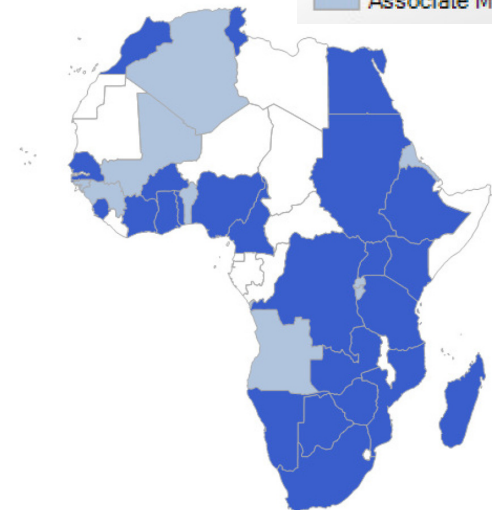

Supplement: MOESM1 [file 9542252]
